# Supplementary material for: Contribution à l'étude théorique et expérimentale des matériaux composites chiraux et bianisotropes dans le domaine microonde
Source: Royal Society of Chemistry journal article supplement (doi:10.1039/c5sm02668g), 1995-01-01

## Supporting Information

**Supplementary figure 1: Concentration of elastically active chains.** **(A)** Concentrations of elastically active chains of 8-arm PEG were greater than those of 4-arm PEG at all biologically relevant PEG solids concentration, indicating a higher PEG functionality would favor intermolecular reactions between elastically active binding sites. **(B)** Concentrations of elastically active chains of 8-arm PEG were available up to 3.75mM L-Cysteine modification when they were only available up to 3mM L-Cysteine modification in 4-arm PEG hydrogels, confirming experimental data on how PEG with higher number of functional binding sites allowed greater degree of biological modification.

# Supplementary figure 1

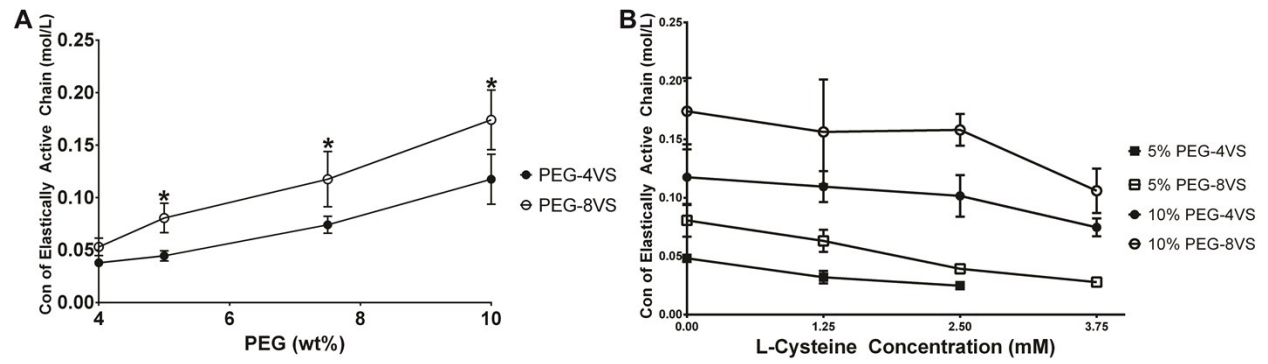

**Supplementary figure 2: LIVE/DEAD assay on 5% 4-arm PEG-VS on Day 12.** Human bone marrow stromal cells (HS-5) viability was confirmed by LIVE/DEAD assay. High Calciën AM (Green) staining confirmed the cell viability was not significantly affected by the RGD concentration. Scale bar: 200µm.

Supplementary figure 2

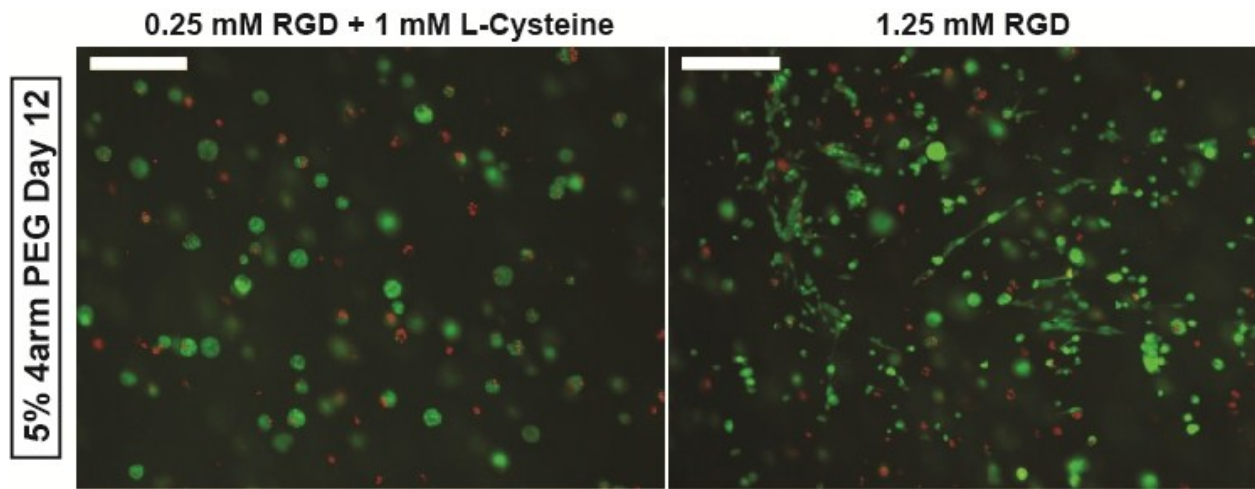

Supplement: c5sm02668g1.pdf [file c5sm02668g1.pdf]
